# Supplementary material for: Vitamin D and idiopathic pulmonary fibrosis: a two-sample mendelian randomization study
Source: PubMed Central journal article supplement (PMC10463904; doi:10.1186/s12890-023-02589-z), 2023-08-23

All - Inverse variance Weighted

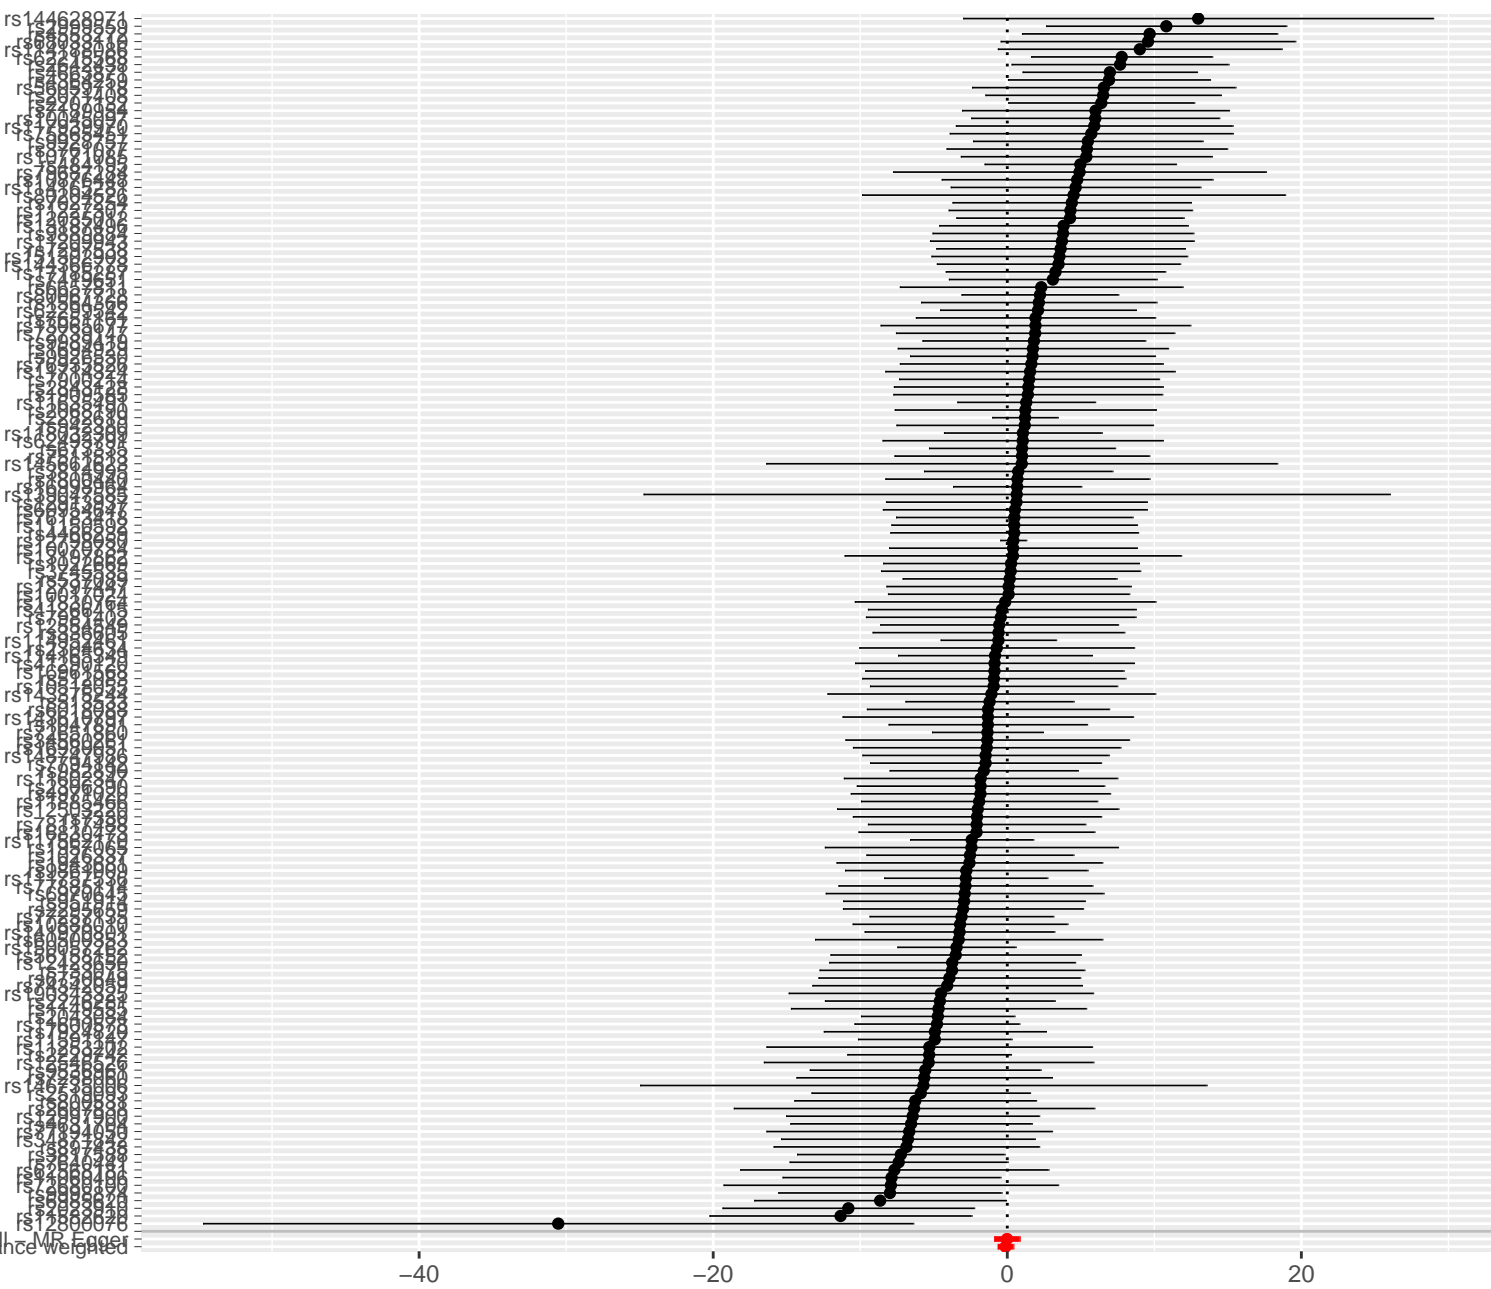

Supplement: 12890_2023_2589_MOESM2_ESM.pdf [file 12890_2023_2589_MOESM2_ESM.pdf]
