# Supplementary material for: Vitamin D and idiopathic pulmonary fibrosis: a two-sample mendelian randomization study
Source: PubMed Central journal article supplement (PMC10463904; doi:10.1186/s12890-023-02589-z), 2023-08-23
Supplement: 12890_2023_2589_MOESM3_ESM.pdf [file 12890_2023_2589_MOESM3_ESM.pdf]

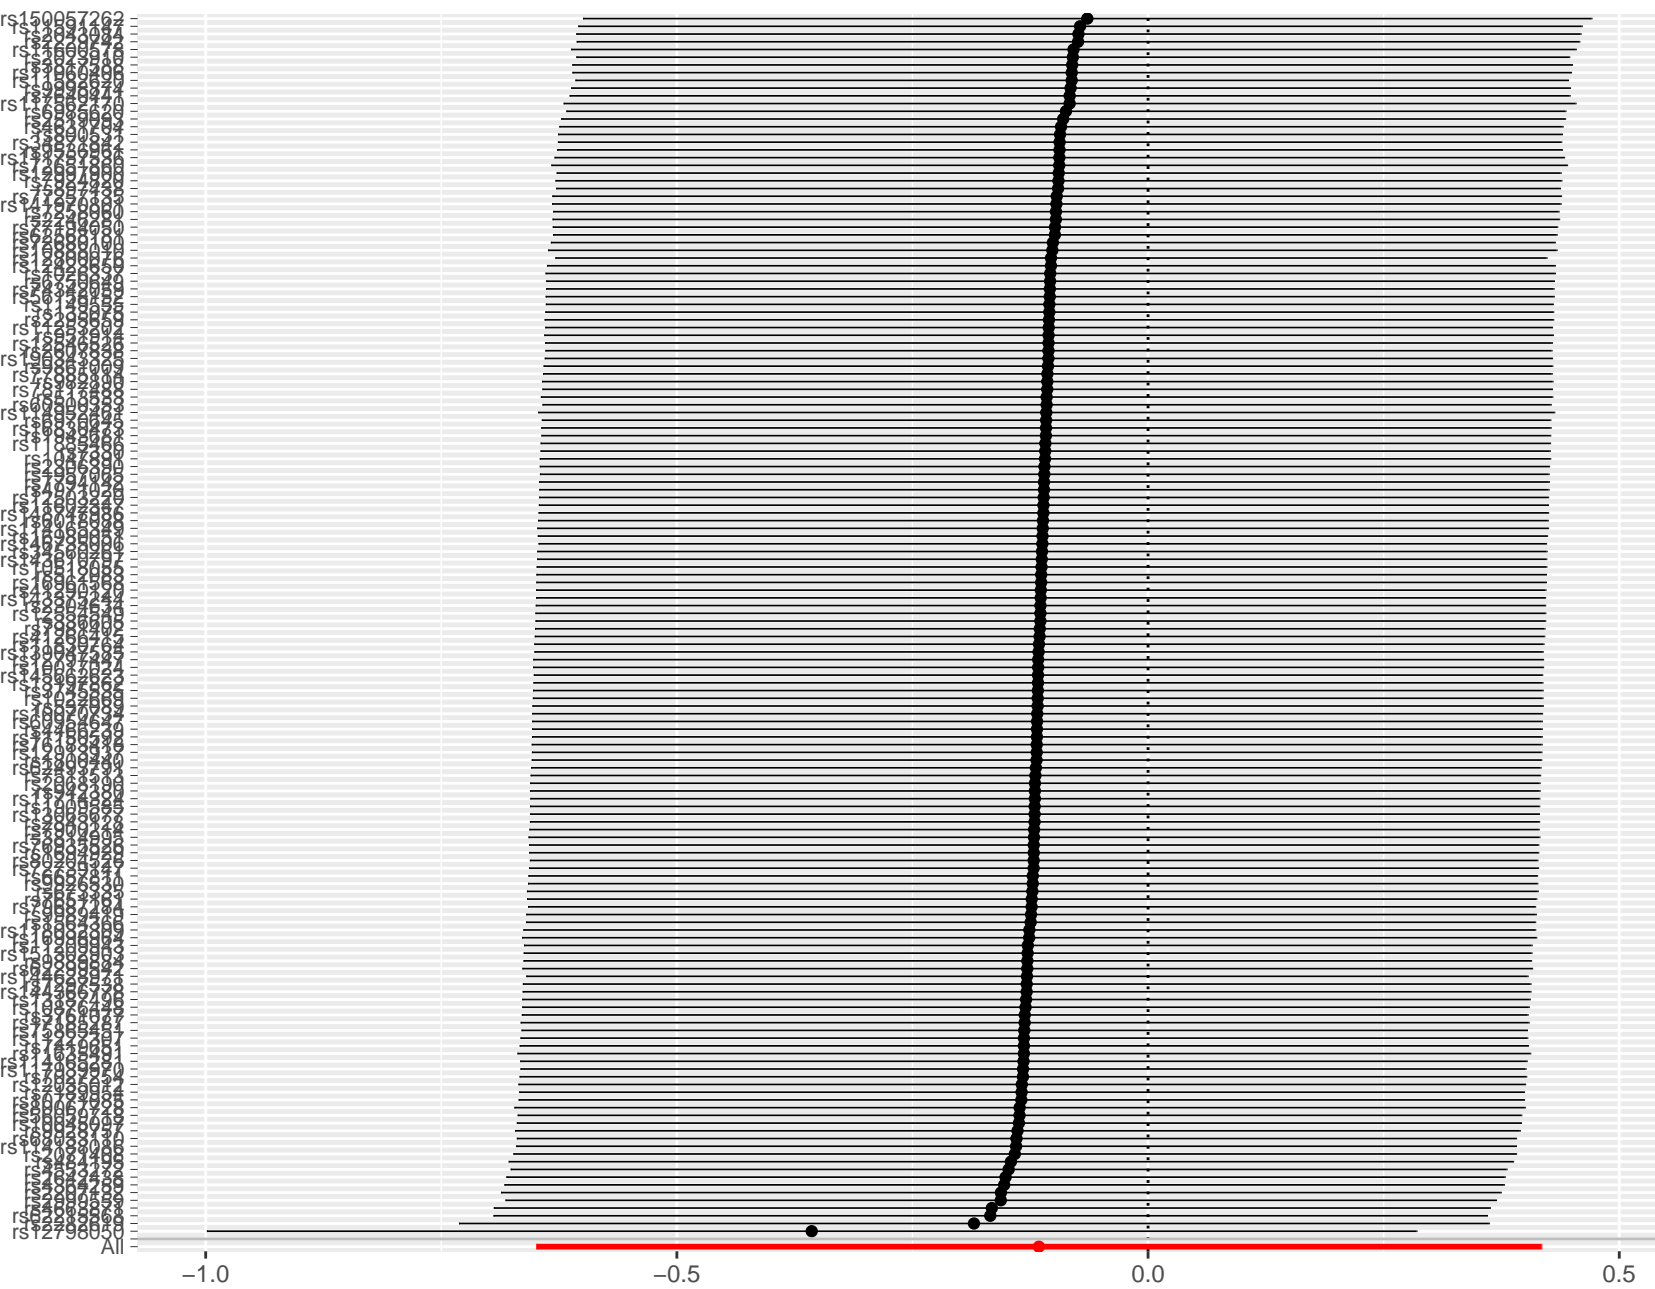

MR leave-one-out sensitivity analysis for  
'25 hydroxyvitamin D level || id:ieu-b-4808' on 'Idiopathic pulmonary fibrosis || id:finn-b-IPF'
